# Supplementary material for: Probing the occurrence, sources and cancer risk assessment of polycyclic aromatic hydrocarbons in PM2.5 in a humid metropolitan city in China
Source: Royal Society of Chemistry journal article supplement (doi:10.1039/d3em00566f), 2024-01-01
Supplement: d3em00566f1.pdf [file d3em00566f1.pdf]

**Probing the occurrence, sources and cancer risk assessment of polycyclic aromatic hydrocarbons in PM<sub>2.5</sub> in a humid metropolitan city of China**

Decai Liu<sup>a</sup>, Xingquan Li<sup>a</sup>, Jiaxin Liu<sup>b</sup>, Fengwen Wang<sup>ac\*</sup>, Yan Leng<sup>d</sup>, Zhenliang Li<sup>c</sup>,

Peili Lu<sup>a</sup>, Neil L. Rose<sup>e</sup>

<sup>a</sup>College of Environment and Ecology, Chongqing University, Chongqing 400030, China

<sup>b</sup>Chongqing University Cancer Hospital, Chongqing University, Chongqing 400030, China

<sup>c</sup>Key Laboratory for Urban Atmospheric Environment Integrated Observation & Pollution Prevention and Control of Chongqing, Chongqing Academy of Environmental Sciences, Chongqing 401147, China

<sup>d</sup>Chongqing Dianjiang Middle School, Chongqing Dianjiang, 408303, China

<sup>e</sup>Environmental Change Research Centre, University College London, Gower Street, London WC1E 6BT, United Kingdom

\* Corresponding author. [fengwenwang@cqu.edu.cn](mailto:fengwenwang@cqu.edu.cn) (Wang, F.W.,)

Table S1 The general information of meteorological conditions during sampling period  
(The AQI and PM2.5 marked red indicate higher than associated standard).

| Date       | T<br>(°C) | RH<br>(%) | AQI | PM <sub>2.5</sub><br>(µg/m <sup>3</sup> ) | Wind<br>speed | Pressure |
|------------|-----------|-----------|-----|-------------------------------------------|---------------|----------|
| 2021.12.01 | 8-15      | 81        | 55  | 35                                        | 2m/s          | 102.8kPa |
| 2021.12.02 | 8-16      | 92        | 73  | 53                                        | 0m/s          | 102.8kPa |
| 2021.12.03 | 7-17      | 92        | 85  | 63                                        | 2m/s          | 102.7kPa |
| 2021.12.05 | 11-17     | 90        | 115 | 87                                        | 1m/s          | 102.7kPa |
| 2021.12.06 | 10-18     | 87        | 104 | 78                                        | 1m/s          | 102.4kPa |
| 2021.12.07 | 11-14     | 86        | 123 | 93                                        | 2m/s          | 102.0kPa |
| 2021.12.08 | 11-12     | 72        | 73  | 53                                        | 1m/s          | 102.6kPa |
| 2021.12.09 | 11-14     | 88        | 103 | 81                                        | 1m/s          | 102.5kPa |
| 2021.12.10 | 11-13     | 72        | 118 | 89                                        | 2m/s          | 102.1kPa |
| 2021.12.11 | 10-12     | 93        | 80  | 59                                        | 2m/s          | 102.6kPa |
| 2021.12.12 | 9-12      | 86        | 29  | 20                                        | 2m/s          | 103.3kPa |
| 2021.12.13 | 9-15      | 93        | 44  | 30                                        | 2m/s          | 102.6kPa |
| 2021.12.14 | 11-14     | 73        | 43  | 31                                        | 3m/s          | 101.9kPa |
| 2021.12.15 | 11-13     | 82        | 63  | 45                                        | 0m/s          | 101.6kPa |
| 2021.12.16 | 9-12      | 76        | 83  | 61                                        | 2m/s          | 102.2kPa |
| 2021.12.17 | 9-10      | 74        | 44  | 27                                        | 2m/s          | 103.1kPa |
| 2021.12.18 | 8-10      | 92        | 50  | 35                                        | 3m/s          | 103.1kPa |
| 2021.12.19 | 6-12      | 79        | 57  | 40                                        | 1m/s          | 102.9kPa |
| 2021.12.20 | 7-13      | 80        | 70  | 51                                        | 2m/s          | 102.5kPa |
| 2021.12.21 | 7-13      | 92        | 77  | 56                                        | 2m/s          | 102.5kPa |
| 2021.12.22 | 8-15      | 94        | 75  | 55                                        | 2m/s          | 102.3kPa |
| 2021.12.23 | 7-12      | 83        | 103 | 77                                        | 2m/s          | 101.5kPa |
| 2021.12.24 | 8-13      | 90        | 143 | 109                                       | 0m/s          | 102.2kPa |
| 2022.1.01  | 4-13      | 91        | 139 | 95                                        | 1m/s          | 103.2kPa |
| 2022.1.02  | 5-12      | 82        | 89  | 66                                        | 1m/s          | 103.0kPa |

|           |       |    |     |    |      |          |
|-----------|-------|----|-----|----|------|----------|
| 2022.1.03 | 8-10  | 76 | 75  | 43 | 2m/s | 103.0kPa |
| 2022.1.05 | 6-13  | 89 | 113 | 85 | 1m/s | 99.1kPa  |
| 2022.1.06 | 9-11  | 82 | 90  | 67 | 1m/s | 99.4kPa  |
| 2022.1.07 | 8-10  | 71 | 79  | 58 | 0m/s | 99.5kPa  |
| 2022.1.08 | 7-12  | 80 | 53  | 37 | 1m/s | 99.5kPa  |
| 2022.1.09 | 6-14  | 92 | 58  | 40 | 1m/s | 99.2kPa  |
| 2022.1.10 | 8-13  | 75 | 62  | 44 | 1m/s | 99.2kPa  |
| 2022.1.11 | 9-15  | 83 | 78  | 57 | 0m/s | 99.4kPa  |
| 2022.1.12 | 9-11  | 73 | 79  | 58 | 1m/s | 99.1kPa  |
| 2022.1.13 | 8-10  | 84 | 124 | 94 | 1m/s | 99.5kPa  |
| 2022.1.14 | 7-12  | 74 | 63  | 45 | 0m/s | 99.0kPa  |
| 2022.1.15 | 8-12  | 74 | 69  | 50 | 1m/s | 99.3kPa  |
| 2022.1.16 | 8-13  | 79 | 89  | 66 | 1m/s | 99.7kPa  |
| 2022.1.17 | 5-13  | 79 | 99  | 74 | 0m/s | 99.8kPa  |
| 2022.1.19 | 6-17  | 71 | 97  | 72 | 1m/s | 99.2kPa  |
| 2022.1.20 | 10-12 | 77 | 102 | 76 | 0m/s | 98.4kPa  |
| 2022.2.16 | 10-14 | 62 | 59  | 42 | 3m/s | 101.5kPa |
| 2022.2.17 | 8-12  | 61 | 25  | 15 | 2m/s | 98.6kPa  |
| 2022.2.18 | 9-12  | 72 | 25  | 15 | 3m/s | 102.1kPa |
| 2022.2.19 | 7-8   | 90 | 32  | 20 | 2m/s | 99.8kPa  |
| 2022.2.20 | 5-8   | 80 | 36  | 25 | 1m/s | 99.9kPa  |
| 2022.2.21 | 4-10  | 64 | 40  | 23 | 3m/s | 100.0kPa |
| 2022.2.22 | 3-9   | 75 | 37  | 25 | 2m/s | 100.2kPa |
| 2022.2.23 | 3-12  | 52 | 44  | 28 | 2m/s | 100.1kPa |
| 2022.2.25 | 7-14  | 63 | 63  | 43 | 2m/s | 99.6kPa  |
| 2022.2.26 | 8-15  | 55 | 83  | 61 | 1m/s | 99.7kPa  |
| 2022.2.27 | 12.5  | 55 | 85  | 63 | 2m/s | 98.6kPa  |

---

Table S2 The detailed human respiratory exposure parameters associated with ILCR

|             | Age<br>(years) | IR (m <sup>3</sup> /d) | BW (kg)     | AT<br>(a) | EF<br>(d/a) | ED<br>(a) | ET (h/d)  | EFA  | ASF |
|-------------|----------------|------------------------|-------------|-----------|-------------|-----------|-----------|------|-----|
| Children    | 6-12           | 11.50±1.95             | 33.37±11.12 | 78        | 365         | 9         | 1.90±0.79 | 0.86 | 2   |
| Adolescents | 13-17          | 13.75±3.12             | 55.79±11.72 | 78        | 365         | 15        | 1.69±0.57 | 0.86 | 2   |
| Adults      | 18-59          | 16.70±2.56             | 62.70±11.30 | 78        | 365         | 39        | 4.31±2.85 | 0.86 | 1   |
| Seniors     | 60-80          | 13.80±1.78             | 60.30±11.19 | 78        | 365         | 70        | 4.02±2.55 | 0.86 | 1   |

and PAF.

The adoption of these parameters aims to align as closely as possible with the actual demographics of the sampled regions. The data for IR, BW, and ET were derived from a survey on exposure parameters conducted specifically for the Chinese population<sup>1,2</sup>. In the original survey report, IR, BW, and ET are only provided with their mean and quartile values. For the purpose of simulation and calculation convenience, it is assumed that they follow a normal distribution. The standard deviation is derived from a specific proportional relationship between the mean and quartile values of the normal distribution, known as the quartile pseudo-standard deviation (F-pseudosigma). Specifically, the F-pseudosigma is obtained by dividing the difference between the upper and lower quartiles by 1.349, and this value is used as the standard deviation for the dataset. AT data was obtained from the *Chongqing City Annual Resident Health Status Report 2020*, released by the Chongqing Municipal Health Commission, which can be available on the web site at: [https://wsjkw.cq.gov.cn/zwgk\\_242/wsjklymsxx/jkfw\\_266458/gzxx\\_266460/202109/t20210930\\_9779478.html](https://wsjkw.cq.gov.cn/zwgk_242/wsjklymsxx/jkfw_266458/gzxx_266460/202109/t20210930_9779478.html). EFA, ASF, and Gensus are sourced from the research findings of Shen et al. focusing on Asian populations<sup>3</sup>. The resulting distributions of GeneSus follow log-normal distributions, and the standard variations of distributions of log<sub>10</sub>-transformed individual GeneSus for Asian 0.65.

Table S3 Limit of detection (LOD) (pg/m<sup>3</sup>) and limit of quantitation (LOQ) (pg/m<sup>3</sup>) for target PAHs.

|     | Nap  | Acy  | Ace  | Flu  | Phe  | Ant  | Flt  | Pyr  | BaA  | Chr  | BbF  | BkF  | BaP  | IcdP | DBA  | BghiP |
|-----|------|------|------|------|------|------|------|------|------|------|------|------|------|------|------|-------|
| LOD | 0.27 | 0.09 | 0.21 | 0.01 | 0.39 | 0.39 | 0.01 | 0.01 | 0.01 | 0.37 | 0.22 | 1.26 | 0.93 | 0.16 | 0.06 | 0.06  |
| LOQ | 0.89 | 0.29 | 0.70 | 0.15 | 1.29 | 1.29 | 0.05 | 0.04 | 0.03 | 1.23 | 0.75 | 4.19 | 3.11 | 0.54 | 0.19 | 0.19  |

Table S4 Recovery of surrogate standard in procedure blank and method blank samples.

| surrogate standard | procedural blank | method blank |
|--------------------|------------------|--------------|
| Nap-d8             | 68.6             | 84.4%        |
| Ace-d10            | 75.8%            | 85.8%        |
| Phe-d10            | 89.7%            | 106.7%       |
| Chr-d12            | 95.7%            | 108.3%       |
| Per-d12            | 101.8%           | 97.6%        |

Table S5 The concentrations of 16 PAHs (ng/m<sup>3</sup>) in all PM<sub>2.5</sub> samples (average, min to max).

| Species  | 2021,12 (n=23)      | 2022,01 (n=18)     | 2022,02 (n=11)     | Average |
|----------|---------------------|--------------------|--------------------|---------|
| Nap      | 28.34 (12.35-81.30) | 17.55 (6.20-31.00) | 12.71 (4.20-19.45) | 19.53   |
| Ac       | 0.17 (0.10-0.25)    | 0.15 (0.10-0.20)   | 0.11 (0.05-0.20)   | 0.14    |
| Ace      | 0.19 (0.05-0.30)    | 0.12 (0.05-0.25)   | 0.13 (0.05-0.35)   | 0.15    |
| Fl       | 0.30 (0.10-0.80)    | 0.26 (0.10-0.75)   | 0.22 (0.10-0.60)   | 0.26    |
| Phe      | 2.00 (0.90-3.95)    | 1.92 (1.05-3.70)   | 1.58 (0.75-3.80)   | 1.83    |
| Ant      | 0.44 (0.10-2.20)    | 0.16 (0.10-0.25)   | 0.57 (0.05-3.70)   | 0.39    |
| 2-3 ring | 31.44 (13.65-88.85) | 20.15 (7.50-36.15) | 15.32 (5.20-28.10) | 22.30   |
| Flu      | 3.89 (2.05-6.15)    | 4.10 (2.40-5.60)   | 2.54 (1.00-4.30)   | 3.51    |
| Pyr      | 4.00 (2.15-6.35)    | 4.00 (2.50-5.30)   | 2.49 (1.25-4.00)   | 3.50    |
| BaA      | 1.84 (0.60-6.70)    | 1.61 (0.80-2.40)   | 0.72 (0.30-1.50)   | 1.39    |
| Chr      | 6.74 (2.65-13.15)   | 7.04 (3.95-10.45)  | 3.34 (1.90-5.15)   | 5.71    |
| 4 ring   | 16.47 (7.45-32.40)  | 16.76 (9.60-23.75) | 9.10 (4.45-14.95)  | 14.11   |
| BbF      | 9.60 (4.80-16.50)   | 9.11 (4.75-13.4)   | 3.77 (2.30-6.80)   | 7.49    |

|          |                          |                      |                     |       |
|----------|--------------------------|----------------------|---------------------|-------|
| BkF      | 2.64 (1.05-4.70)         | 2.62 (1.50-3.75)     | 1.20 (0.65-1.80)    | 2.15  |
| BaP      | 4.22 (1.65-8.25)         | 3.93 (2.20-5.60)     | 1.57 (0.95-2.70)    | 3.24  |
| IP       | 5.21 (2.50-9.40)         | 5.10 (2.85-7.40)     | 2.19 (1.30-3.55)    | 4.17  |
| DBA      | 1.78 (0.65-3.15)         | 1.69 (0.80-2.70)     | 0.50 (0.05-0.85)    | 1.32  |
| BghiP    | 5.99 (2.80-10.95)        | 5.38 (2.95-7.55)     | 2.28 (1.55-3.15)    | 4.55  |
| 5-6 ring | 29.43 (13.50-<br>52.90)  | 27.83 (15.10-40.40)  | 11.51 (6.80-18.85)  | 22.92 |
| 16PAHs   | 77.34 (34.60-<br>174.15) | 64.74 (32.20-100.30) | 35.93 (16.45-61.40) | 59.32 |

---

**Table S6** Comparison of PAHs Concentrations in PM<sub>2.5</sub> or total suspended particulate matter (TSP) across different sampling regions.

| Sampling site        | Sampling time | Species | Sample type       | Concentration | Reference  |
|----------------------|---------------|---------|-------------------|---------------|------------|
| Chongqing            | Winter 2021   | 16PAHs  | TSP               | 59.35         | This study |
| Beijing              | Winter 2013   | 16PAHs  | TSP               | 120.20        | 4          |
| Nanjing, Jiangsu     | Winter 2014   | 18PAHs  | TSP               | 50.60         | 5          |
| Wuhan, Hubei         | Winter 2011   | 16PAHs  | TSP               | 59.77         | 6          |
| Chengdu, Sichuan     | Winter 2010   | 16PAHs  | TSP               | 71.38         | 7          |
| Nanchang, Jiangxi    | Winter 2014   | 15PAHs  | TSP               | 22.54         | 8          |
| Shanghai             | Winter 2014   | 16PAHs  | TSP               | 15.90         | 9          |
| Hong Kong            | Winter 2011   | 16PAHs  | TSP               | 4.60          | 10         |
| Guangzhou, Guangdong | Winter 2016   | 16PAHs  | TSP               | 10.31         | 11         |
| Hangzhou, Zhejiang   | Winter 2021   | 16PAHs  | PM <sub>2.5</sub> | 27.90         | 12         |
| Jinan, Shandong      | Winter 2016   | 16PAHs  | PM <sub>2.5</sub> | 72.60         | 13         |
| Harbin, Heilongjiang | Winter 2008   | 16PAHs  | TSP               | 85.70         | 14         |
| Kunming, Yunnan      | Winter 2012   | 16PAHs  | TSP               | 46.89         | 15         |
| Guiyang, Guizhou     | Winter 2005   | 16PAHs  | TSP               | 18.40         | 16         |
| Xi'an, Shaanxi       | Winter 2016   | 16PAHs  | PM <sub>2.5</sub> | 115.00        | 17         |
| Zhengzhou, Henan     | Winter 2018   | 16PAHs  | PM <sub>2.5</sub> | 45.80         | 18         |
| Taiyuan, Shanxi      | Winter 2012   | 16PAHs  | PM <sub>2.5</sub> | 215.93        | 19         |

**Table S7** The comparison of 16PAHs between normal and polluted days during sampling period.

| PAHs               | 2021, 12      |             | 2022, 01      |             |
|--------------------|---------------|-------------|---------------|-------------|
| Species            | Polluted days | Normal days | Polluted days | Normal days |
| Nap                | 26.45         | 19.95       | 18.00         | 13.20       |
| Acy                | 0.20          | 0.15        | 0.15          | 0.10        |
| Ace                | 0.20          | 0.15        | 0.10          | 0.10        |
| Flu                | 0.35          | 0.30        | 0.35          | 0.20        |
| Phe                | 2.35          | 1.70        | 2.30          | 1.50        |
| Ant                | 0.45          | 0.10        | 0.15          | 1.50        |
| Flt                | 4.75          | 2.70        | 4.45          | 3.05        |
| Pyr                | 4.85          | 2.70        | 4.30          | 2.95        |
| BaA                | 2.10          | 0.85        | 1.65          | 1.15        |
| Chr                | 1.73          | 3.95        | 7.70          | 5.00        |
| BbF                | 8.65          | 5.50        | 10.05         | 6.70        |
| BkF                | 3.40          | 1.55        | 2.90          | 1.90        |
| BaP                | 5.50          | 2.20        | 3.90          | 2.90        |
| IcdP               | 6.90          | 3.05        | 5.45          | 3.65        |
| DBA                | 2.15          | 0.9         | 1.75          | 1.15        |
| BghiP              | 7.80          | 3.4         | 5.55          | 3.00        |
| $\Sigma_{16}$ PAHs | 88.35         | 49.1        | 68.85         | 47.55       |



**Table S8** Comparison of the recorded annual lung cancer incidence rates with the modeled lung cancer risk due to ambient PAHs exposure.

| Age groups (y) | Actual incidence rate of lung cancer in Chongqing in 2017 ( $\times 10^{-5}$ ) | Model predicted PAF (%) |         | Model predicted excess annual lung cancer incidence rate by PAF approach ( $\times 10^{-6}$ ) |         | Model predicted ILCR ( $\times 10^{-6}$ ) |      |
|----------------|--------------------------------------------------------------------------------|-------------------------|---------|-----------------------------------------------------------------------------------------------|---------|-------------------------------------------|------|
|                |                                                                                | URR=4.49                | URR=1.3 | URR=4.49                                                                                      | URR=1.3 | ET=24h                                    |      |
| 6-12           | —                                                                              | 2.31                    | 0.44    | —                                                                                             | —       | 0.25                                      | —    |
| 13-18          | —                                                                              | 2.05                    | 0.38    | —                                                                                             | —       | 0.23                                      | —    |
| 19-60          | 245.82                                                                         | 1.08                    | 0.19    | 26.54                                                                                         | 4.67    | 0.71                                      | 4.31 |
| 61-80          | 348.29                                                                         | 1.08                    | 0.20    | 37.62                                                                                         | 6.96    | 1.23                                      | 7.03 |

**Table S9** Total toxic equivalent (TEQ) and excess incremental lifetime carcinogenic risk (ILCR) of PAHs in different cities (ND- Not Detected).

| Location/Country  | Sampling period | PAHs    | $\Sigma$ PAHs (ng/m <sup>3</sup> ) | TEQ (ng/m <sup>3</sup> ) | ILCR                          |                             | References                 |
|-------------------|-----------------|---------|------------------------------------|--------------------------|-------------------------------|-----------------------------|----------------------------|
|                   |                 | Species |                                    |                          | Children ( $\times 10^{-6}$ ) | Adults ( $\times 10^{-6}$ ) |                            |
| Chongqing, China  | 2021-2022       | 16      | 59.35                              | 6.23                     | 0.53                          | 2.45                        | <a href="#">This study</a> |
| Nanjing, China    | 2015            | 16      | 91.80                              | 1.09                     | 0.26                          | 0.41                        | 20                         |
| Dongguan, China   | 2017-2018       | 16      | 40.27                              | ND                       | 3.81                          | 4.83                        | 21                         |
| Shenzhen, China   | 2012-2013       | 16      | 111.90                             | 2.44                     | 0.20                          | 1.23                        | 22                         |
| Xi'an, China      | 2013            | 16      | 57.10                              | 6.90                     | ND                            | 7.60                        | 23                         |
| Jamshedpur, India | 2018-2019       | 16      | 321.71                             | 69.39                    | 12.71                         | 30.53                       | 24                         |
| Agra, India       | 2010-2012       | 16      | 1668.10                            | 37.10                    | 4.19                          | 99.80                       | 25                         |
| Tehran, Iran      | 2018-2019       | 16      | 20.10                              | 2.92                     | ND                            | 3.14                        | 26                         |

## Text S1 Air mass back trajectories

Frequencies of the 72-hour air mass back trajectories arriving at sampling site during the sampling period are shown as percentages in Figure S1 and show source regions may extend as far as Henan in northern China and Myanmar bordering Yunnan Province. However, in general, air masses typically derived from north and east regions near to Chongqing as air masses in winter were affected by temperature and terrain, making the transport speed slow and paths relatively short. From Figure S1 it can be seen that the air parcels arriving during December 2021 mainly came from Sichuan Province and eastern Chongqing, accounting for 38.7% and 21.7%, respectively. In January 2022 air masses mainly came from eastern and southeast Chongqing (36.9% and 22.7%, respectively) while in February 2022 air masses mainly came from southwest Chongqing, Hubei Province and Hunan Province, accounting for 24.7%, 33.3% and 21.9%, respectively.

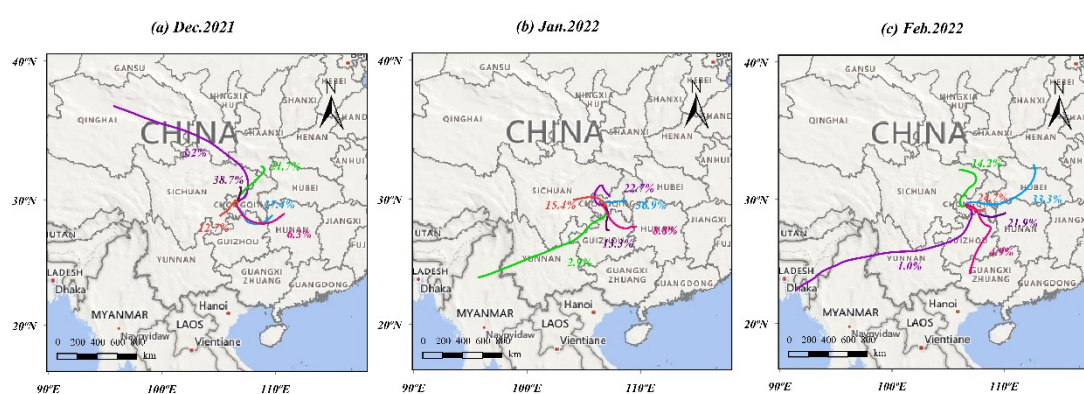

Figure S1 Frequencies of the 72-hour air mass back trajectories arriving at sampling site during the sampling period.

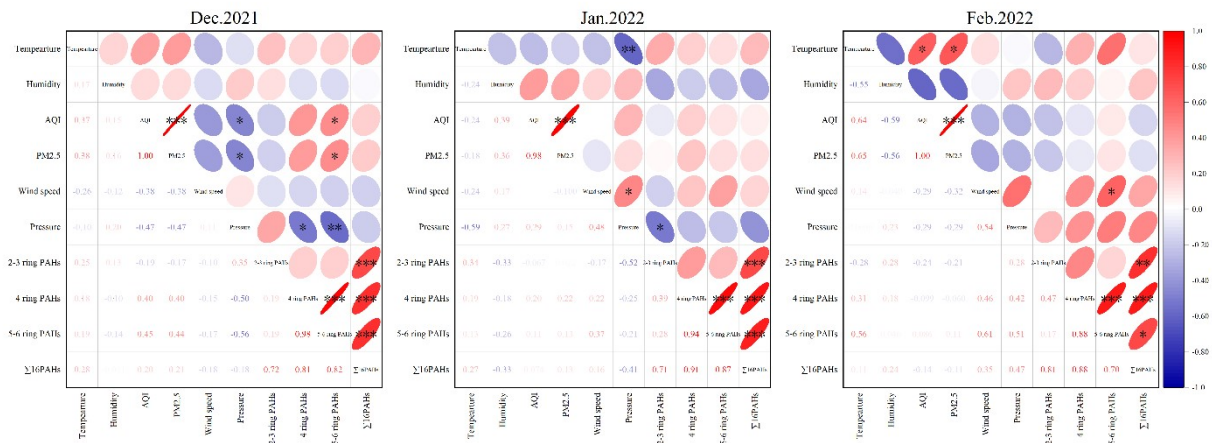

Figure S2 The correlations between the 16 PAHs and six parameters, including temperature, relative humidity, wind speed, air pressure, air quality index (AQI) and concentration of PM<sub>2.5</sub> (\* p ≤ 0.05 \*\* p ≤ 0.01 \*\*\* p ≤ 0.001).

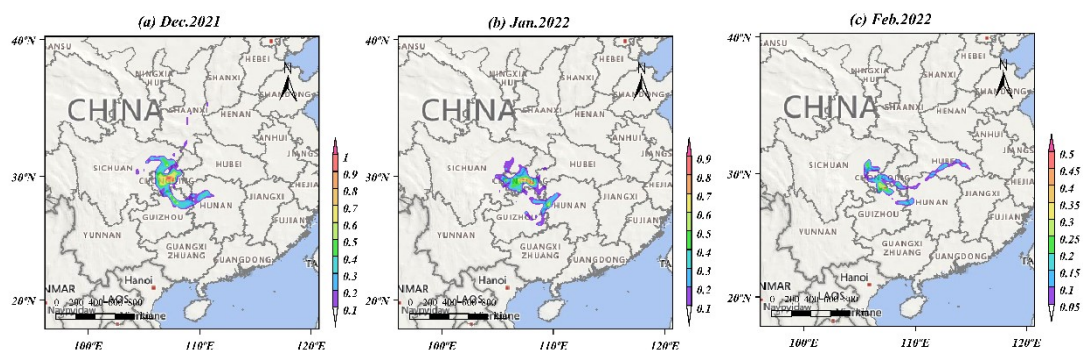

Figure S3 The potential sources of PAHs by PSCF algorithm during the sampling period.

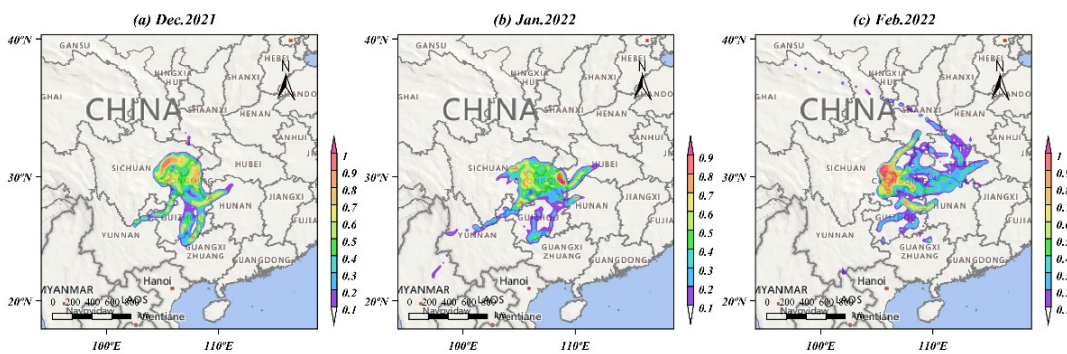

Figure S4 The potential sources of PM<sub>2.5</sub> concentrations by PSCF algorithm during the sampling period.

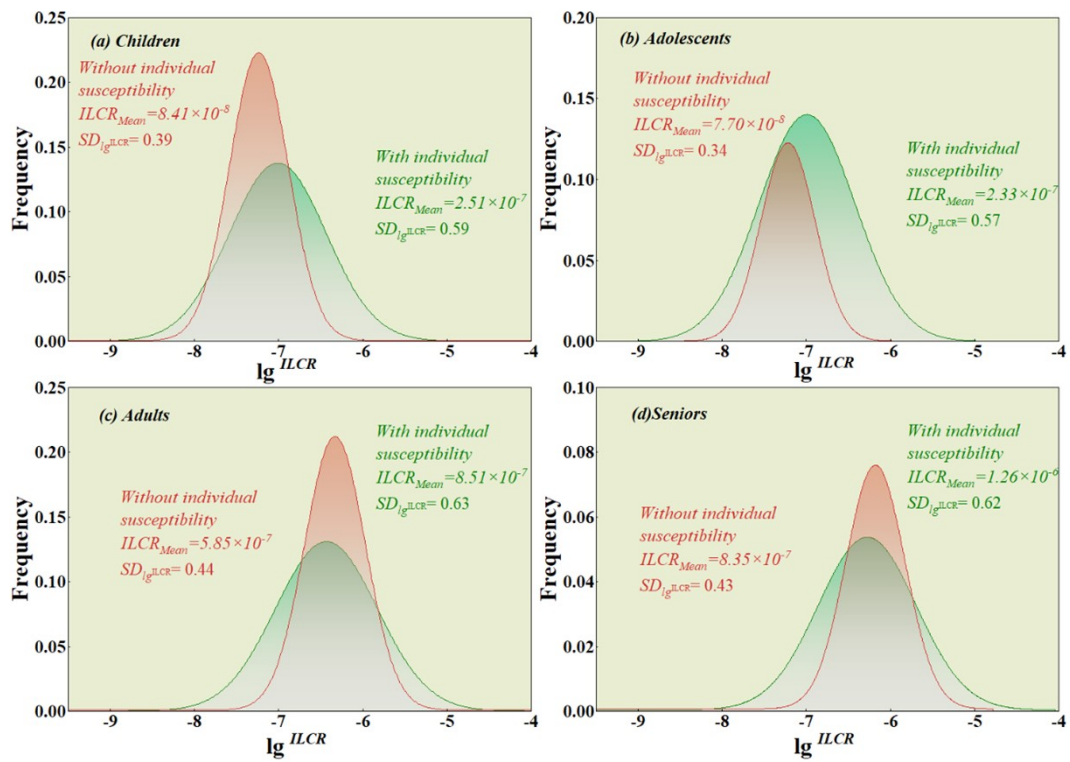

Figure S5 Probability distribution of ILCR simulation results considering overall susceptibility and without overall susceptibility.

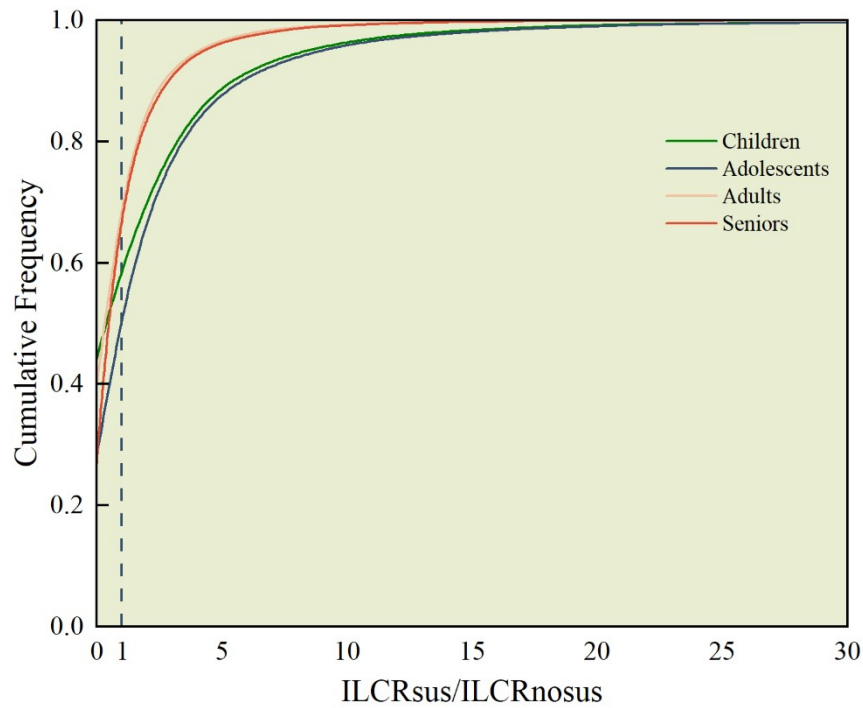

Figure S6 Cumulative curves of ILCR rate distribution results from 10,000 Monte Carlo simulations with and without considering individual susceptibility.

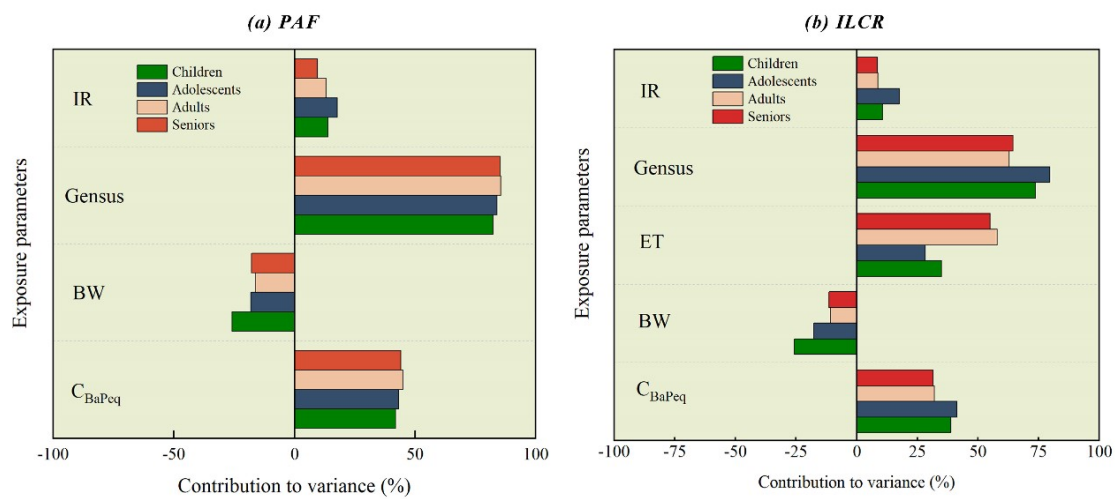

Figure S7 Sensitivity analysis results for PAF (a) and ILCR (b) models.

## References:

- 1 X. Duan, *Highlights of the Chinese Exposure Factors Handbook(adults)*, China Environmental Science Press, Beijing, 2014.
- 2 X. Duan, *Highlights of the Chinese Exposure Factors Handbook(children)*, China Environmental Science Press, Beijing, 2016.
- 3 H. Shen, S. Tao, J. Liu, Y. Huang, H. Chen, W. Li, Y. Zhang, Y. Chen, S. Su, N. Lin, Y. Xu, B. Li, X. Wang and W. Liu, Global lung cancer risk from PAH exposure highly depends on emission sources and individual susceptibility, *Sci. Rep.*, 2014, **4**, 6561.
- 4 Chao Wang, Linling Zhang, Xu Dao, Yibing Lv, Enjiang Teng, and Guogang Li, Pollution characteristics and source identification of polycyclic aromatic hydrocarbons in airborne particulates of Beijing-Tianjin-Hebei Region, China, *China Environ. Sci.*, 2015, **35**, 1–6.
- 5 S. Kong, X. Li, L. Li, Y. Yin, K. Chen, L. Yuan, Y. Zhang, Y. Shan and Y. Ji, Variation of polycyclic aromatic hydrocarbons in atmospheric PM<sub>2.5</sub> during winter haze period around 2014 Chinese spring festival at nanjing: Insights of source changes, air mass direction and firework particle injection, *Science of The Total Environment*, 2015, **520**, 59–72.
- 6 Yin Z., Jiabin Z., Lei W., Jinghan X. and Haotian G., Distribution characteristics and sources of polycyclic aromatic hydrocarbons (PAHs) in atmospheric PM<sub>2.5</sub> in autumn and winter in Wuhan, China, *Ecol. Environ. Sci.*, 2013, **22**, 506–511.
- 7 Gang Chen, Xiaoyu Zhou, Jianhui Wu, Yingze Tian, Laidong Zhou, Guoliang Shi, and Yinchang Feng, Source analysis and toxicity source analysis of polycyclic aromatic hydrocarbons (PAHs) in winter PM<sub>2.5</sub> in Chengdu city, *China Environ. Sci.*, 2015, **35**, 3150–3156.
- 8 X. Liu, C. Li, H. Tu, Y. Wu, C. Ying, Q. Huang, S. Wu, Q. Xie, Z. Yuan and Y. Lu, Analysis of the effect of meteorological factors on PM<sub>2.5</sub>-associated PAHs during autumn-winter in urban nanchang, *Aerosol Air Qual. Res.*, 2016, **16**, 3222–3229.
- 9 Q. Wang, M. Liu, Y. Yu and Y. Li, Characterization and source apportionment of PM<sub>2.5</sub>-bound polycyclic aromatic hydrocarbons from shanghai city, China,



- Environ. Pollut.*, 2016, **218**, 118–128.
- 10 Y. Ma, Y. Cheng, X. Qiu, Y. Lin, J. Cao and D. Hu, A quantitative assessment of source contributions to fine particulate matter (PM<sub>2.5</sub>)-bound polycyclic aromatic hydrocarbons (PAHs) and their nitrated and hydroxylated derivatives in hong kong, *Environ. Pollut.*, 2016, **219**, 742–749.
  - 11 Y. Song, Y. Zhang, R. Li, W. Chen, C. K. A. Chung and Z. Cai, The cellular effects of PM<sub>2.5</sub> collected in Chinese taiyuan and guangzhou and their associations with polycyclic aromatic hydrocarbons (PAHs), nitro-PAHs and hydroxy-PAHs, *Ecotoxicol. Environ. Saf.*, 2020, **191**, 110225.
  - 12 L. Duan, H. Yu, Q. Wang, Y. Cao, G. Wang, X. Sun, H. Li, T. Lin and Z. Guo, PM<sub>2.5</sub>-bound polycyclic aromatic hydrocarbons of a megacity in eastern China: Source apportionment and cancer risk assessment, *Science of The Total Environment*, 2023, **869**, 161792.
  - 13 Y. Zhang, L. Yang, X. Zhang, J. Li, T. Zhao, Y. Gao, P. Jiang, Y. Li, X. Chen and W. Wang, Characteristics of PM<sub>2.5</sub>-bound PAHs at an urban site and a suburban site in jinan in north China plain, *Aerosol Air Qual. Res.*, 2019, **19**, 871–884.
  - 14 W.-L. Ma, Y.-F. Li, H. Qi, D.-Z. Sun, L.-Y. Liu and D.-G. Wang, Seasonal variations of sources of polycyclic aromatic hydrocarbons (PAHs) to a northeastern urban city, China, *Chemosphere*, 2010, **79**, 441–447.
  - 15 X. Yang, D. Ren, W. Sun, X. Li, B. Huang, R. Chen, C. Lin and X. Pan, Polycyclic aromatic hydrocarbons associated with total suspended particles and surface soils in kunming, China: Distribution, possible sources, and cancer risks, *Environ. Sci. Pollut. R.*, 2015, **22**, 6696–6712.
  - 16 J. Hu, C. Q. Liu, G. P. Zhang and Y. L. Zhang, Seasonal variation and source apportionment of PAHs in TSP in the atmosphere of guiyang, southwest China, *Atmos. Res.*, 2012, **118**, 271–279.
  - 17 L. Wang, S. Dong, M. Liu, W. Tao, B. Xiao, S. Zhang, P. Zhang and X. Li, Polycyclic aromatic hydrocarbons in atmospheric PM<sub>2.5</sub> and PM<sub>10</sub> in the semi-arid city of xi'an, northwest China: Seasonal variations, sources, health risks, and relationships with meteorological factors, *Atmos. Res.*, 2019, **229**, 60–73.

- 18 Z. Dong, Z. Dong, R. Zhang and X. Li, Seasonal characterization, sources, and source-specific risks of PM<sub>2.5</sub> bound PAHs at different types of urban sites in central China, *Atmospheric Pollution Research*, 2023, **14**, 101666.
- 19 M. Zhang, J. Xie, Z. Wang, L. Zhao, H. Zhang and M. Li, Determination and source identification of priority polycyclic aromatic hydrocarbons in PM<sub>2.5</sub> in taiyuan, China, *Atmos. Res.*, 2016, **178–179**, 401–414.
- 20 Q. Chen, Y. Chen, X.-S. Luo, Y. Hong, Z. Hong, Z. Zhao and J. Chen, Seasonal characteristics and health risks of PM<sub>2.5</sub>-bound organic pollutants in industrial and urban areas of a China megacity, *Journal of Environmental Management*, 2019, **245**, 273–281.
- 21 Y. Chen, B. Lai, Y. Wei, Q. Ma, H. Liang, H. Yang, R. Ye, M. Zeng, H. Wang, Y. Wu, X. Liu, L. Guo and H. Tang, Polluting characteristics, sources, cancer risk, and cellular toxicity of PAHs bound in atmospheric particulates sampled from an economic transformation demonstration area of Dongguan in the Pearl River Delta, China, *Environmental Research*, 2022, **215**, 114383.
- 22 J.-L. Sun, X. Jing, W.-J. Chang, Z.-X. Chen and H. Zeng, Cumulative health risk assessment of halogenated and parent polycyclic aromatic hydrocarbons associated with particulate matters in urban air, *Ecotoxicol. Environ. Saf.*, 2015, **113**, 31–37.
- 23 H. Xu, S. S. H. Ho, M. Gao, J. Cao, B. Guinot, K. F. Ho, X. Long, J. Wang, Z. Shen, S. Liu, C. Zheng and Q. Zhang, Microscale spatial distribution and health assessment of PM<sub>2.5</sub>-bound polycyclic aromatic hydrocarbons (PAHs) at nine communities in Xi'an, China, *Environmental Pollution*, 2016, **218**, 1065–1073.
- 24 B. Ambade, A. Kumar and L. K. Sahu, Characterization and health risk assessment of particulate bound polycyclic aromatic hydrocarbons (PAHs) in indoor and outdoor atmosphere of Central East India, *Environ. Sci. Pollut. Res.*, 2021, **28**, 56269–56280.
- 25 J. Dubey, K. Maharaj Kumari and A. Lakhani, Chemical characteristics and mutagenic activity of PM<sub>2.5</sub> at a site in the indo-gangetic plain, India, *Ecotoxicol. Environ. Saf.*, 2015, **114**, 75–83.

- 26 M. S. Ali-Taleshi, M. Moeinaddini, A. Riyahi Bakhtiari, S. Feiznia, S. Squizzato and A. Bourliva, A one-year monitoring of spatiotemporal variations of PM<sub>2.5</sub>-bound PAHs in Tehran, Iran: Source apportionment, local and regional sources origins and source-specific cancer risk assessment, *Environmental Pollution*, 2021, **274**, 115883.
